# Supplementary material
Source: PubMed Central journal article supplement (PMC3856204)

## Supplementary Data

RNA-Seq Analysis Identifies A Novel Set of Editing Substrates for Human ADAR2 Present in *Saccharomyces cerevisiae*

Tristan Eifler, Subhash Pokharel and Peter A. Beal\*

Department of Chemistry, University of California, One Shields Ave, Davis, CA 95616

\*Corresponding author

**Table S1.** For A positions in the reference genome present in the RNA transcript: Candidate sites exhibiting 50 or more A reads for inactive ADAR2 sample and 50 or more G reads in active ADAR2 sample with the %G for inactive ADAR2 is <2% and the %G for active ADAR2 is >10%.

| Chr#    | Position | Wt ADAR2 strain<br>Read Counts |     | ADAR2 E396A strain<br>Read Counts |   | Wt<br>ADAR2 | ADAR2<br>E396A |
|---------|----------|--------------------------------|-----|-----------------------------------|---|-------------|----------------|
|         |          | A                              | G   | A                                 | G | %G          | %G             |
| chrII   | 278998   | 2492                           | 437 | 3127                              | 1 | 14.9%       | 0.03%          |
| chrII   | 278999   | 2608                           | 318 | 3112                              | 2 | 10.9%       | 0.06%          |
| chrIV   | 331829   | 30                             | 51  | 90                                | 0 | 62.9%       | 0.00%          |
| chrVI   | 75228    | 699                            | 129 | 558                               | 4 | 15.6%       | 0.71%          |
| chrVI   | 75995    | 267                            | 61  | 236                               | 0 | 18.6%       | 0.00%          |
| chrVI   | 76061    | 363                            | 55  | 255                               | 0 | 13.2%       | 0.00%          |
| chrVI   | 76276    | 583                            | 94  | 250                               | 0 | 13.9%       | 0.00%          |
| chrVI   | 76404    | 483                            | 143 | 225                               | 1 | 22.8%       | 0.44%          |
| chrVII  | 311091   | 85                             | 71  | 148                               | 0 | 45.5%       | 0.00%          |
| chrXIII | 634284   | 499                            | 57  | 789                               | 1 | 10.3%       | 0.13%          |

**Table S2.** For T positions in the reference genome complementary to the RNA transcript: Candidate sites exhibiting 50 or more T reads for inactive ADAR2 sample and 50 or more C reads in active ADAR2 sample with the %C for inactive ADAR2 is <2% and the %C for active ADAR2 is >10%.

| Chr#   | Position | Wt ADAR2 strain<br>Read Counts |      | ADAR2 E396A strain<br>Read Counts |     | Wt<br>ADAR2 | ADAR2<br>E396A |
|--------|----------|--------------------------------|------|-----------------------------------|-----|-------------|----------------|
|        |          | C                              | T    | C                                 | T   | %C          | %C             |
| chrII  | 680804   | 51                             | 54   | 1                                 | 73  | 48.6%       | 1.35%          |
| chrII  | 680826   | 112                            | 33   | 1                                 | 66  | 77.2%       | 1.49%          |
| chrII  | 680853   | 164                            | 34   | 0                                 | 128 | 82.8%       | 0.00%          |
| chrII  | 681346   | 183                            | 25   | 0                                 | 96  | 88.0%       | 0.00%          |
| chrXII | 453079   | 220                            | 1215 | 0                                 | 646 | 15.3%       | 0.00%          |
| chrXIV | 230439   | 212                            | 150  | 0                                 | 60  | 58.6%       | 0.00%          |
| chrXIV | 230607   | 74                             | 137  | 0                                 | 59  | 35.1%       | 0.00%          |

**Supplementary Figure 1.** Confirmation of predicted editing sites in *S. cerevisiae* transcriptome confirmed via Sanger sequencing of cDNA derived from RT-PCR of yeast total RNA. Edited sites are indicated by a black triangle. **A** Sequence traces incorporating predicted editing sites derived from total RNA isolated from *S. cerevisiae* strain INVSc1 expressing ADAR2 wt or inactive mutant ADAR2 E396A. **B** Sequence traces of cDNA incorporating predicted editing sites derived from total RNA isolated from *S. cerevisiae* strain INVSc1 that was incubated in micromolar concentrations of ADAR2 wt or ADAR2 E396A for 4 hours at 30 °C.

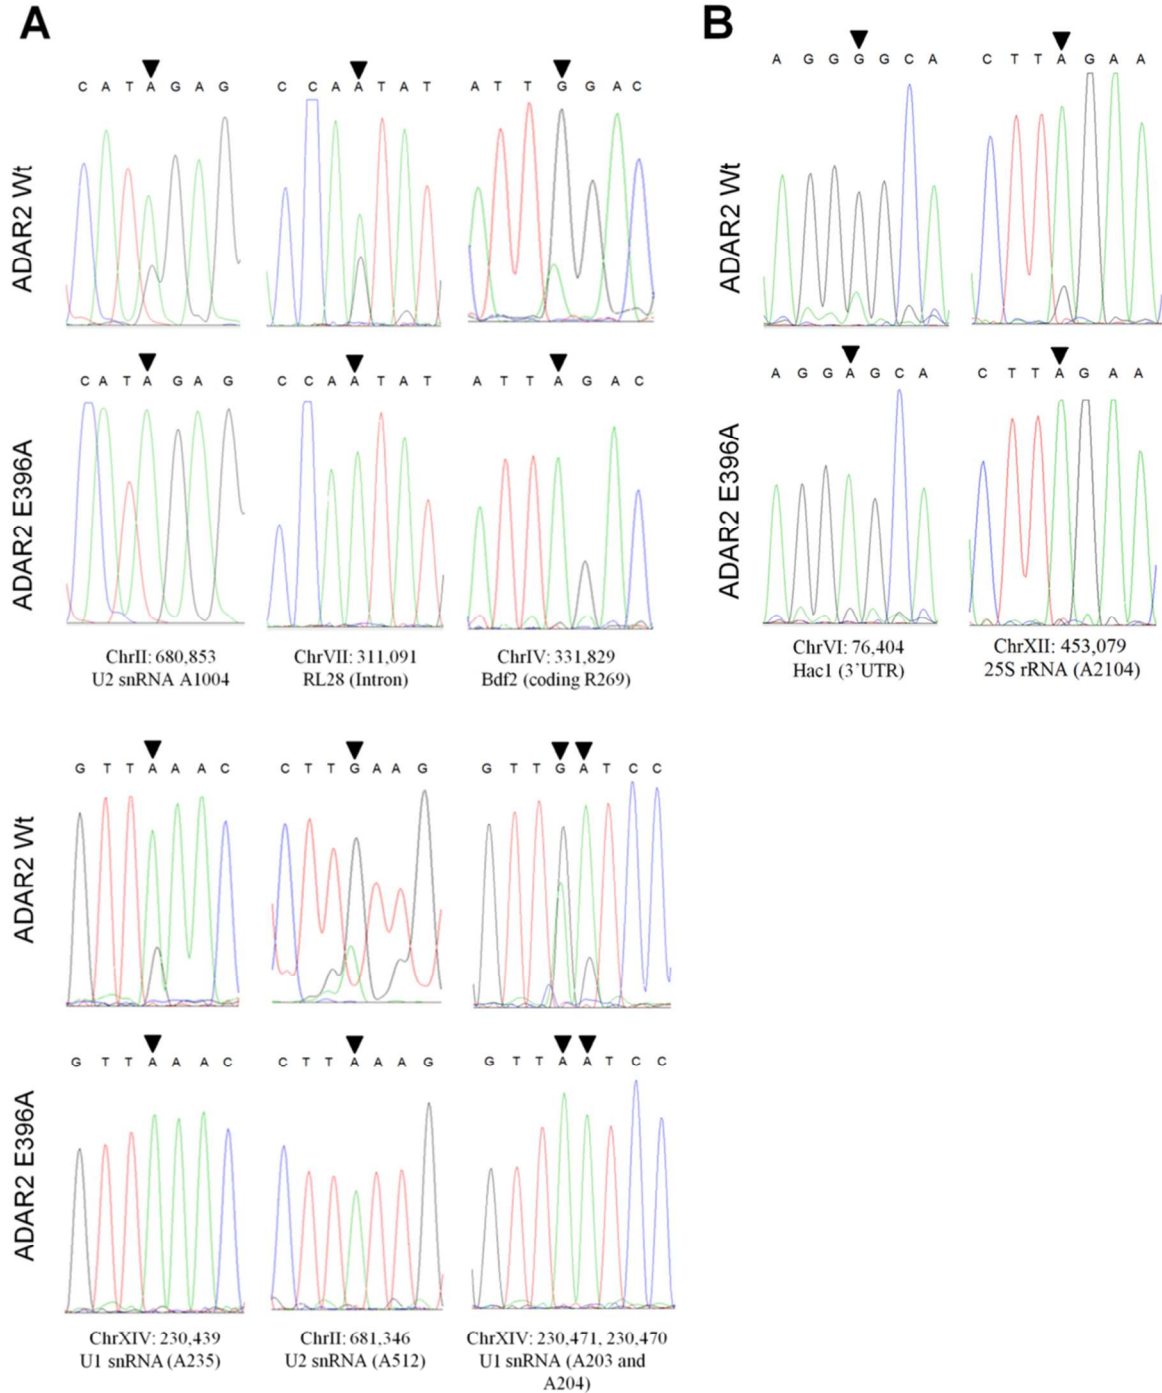



**Supplementary Figure 3.** Extended WebLogo sequence alignment analysis of predicted ADAR2 editing site regions in *S. cerevisiae*. Edited adenosine is indicated by a star. **A** WebLogo incorporating flanking regions of edited sites with a %G of at least 6.0 in strains expressing ADAR2 wt and a %G of less than 2.0 in strains expressing ADAR2 E396A, i.e., at least a three-fold difference in %G from ADAR2 wt to ADAR2 E396A (36 sites). **B** WebLogo incorporating flanking regions of edited sites with a %G of at least 8.0 in strains expressing ADAR2 wt and a %G of less than 2.0 in strains expressing ADAR2 E396A, i.e., at least a four-fold difference in %G from ADAR2 wt to ADAR2 E396A (25 sites). **C** WebLogo incorporating flanking regions of editing sites with a %G of at least 10.0 in strains expressing ADAR2 wt and a %G of less than 2.0 in strains expressing ADAR2 E396A, i.e., at least a five-fold difference in %G from ADAR2 wt to ADAR2 E396A (19 sites).

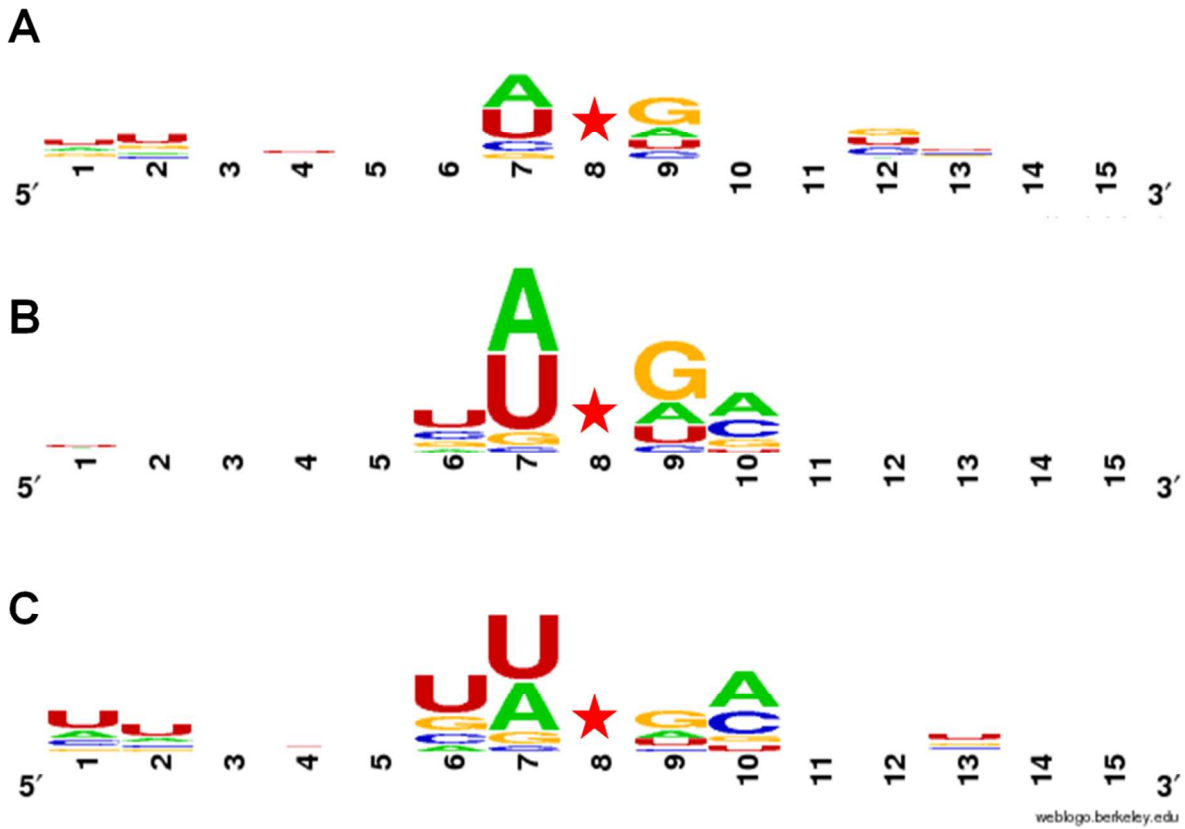

**Supplementary Figure 4.** *In vitro* deamination of Bdf2 RNA and 3' next nearest neighbor variants by ADAR2. Deamination expressed as fraction product over time with 0, 1, 2, 5 and 30 minute time points (n=3). Data were fitted to the equation  $y = m1*(1-e^{(-m2*m0)})$ , where m1 is the fitted reaction end point, m2 is the  $k_{obs}$  or fitted rate constant ( $\text{min}^{-1}$ ), and y is the fraction product at time m0. Graphs were generated using KaleidaGraph (Synergy Software).

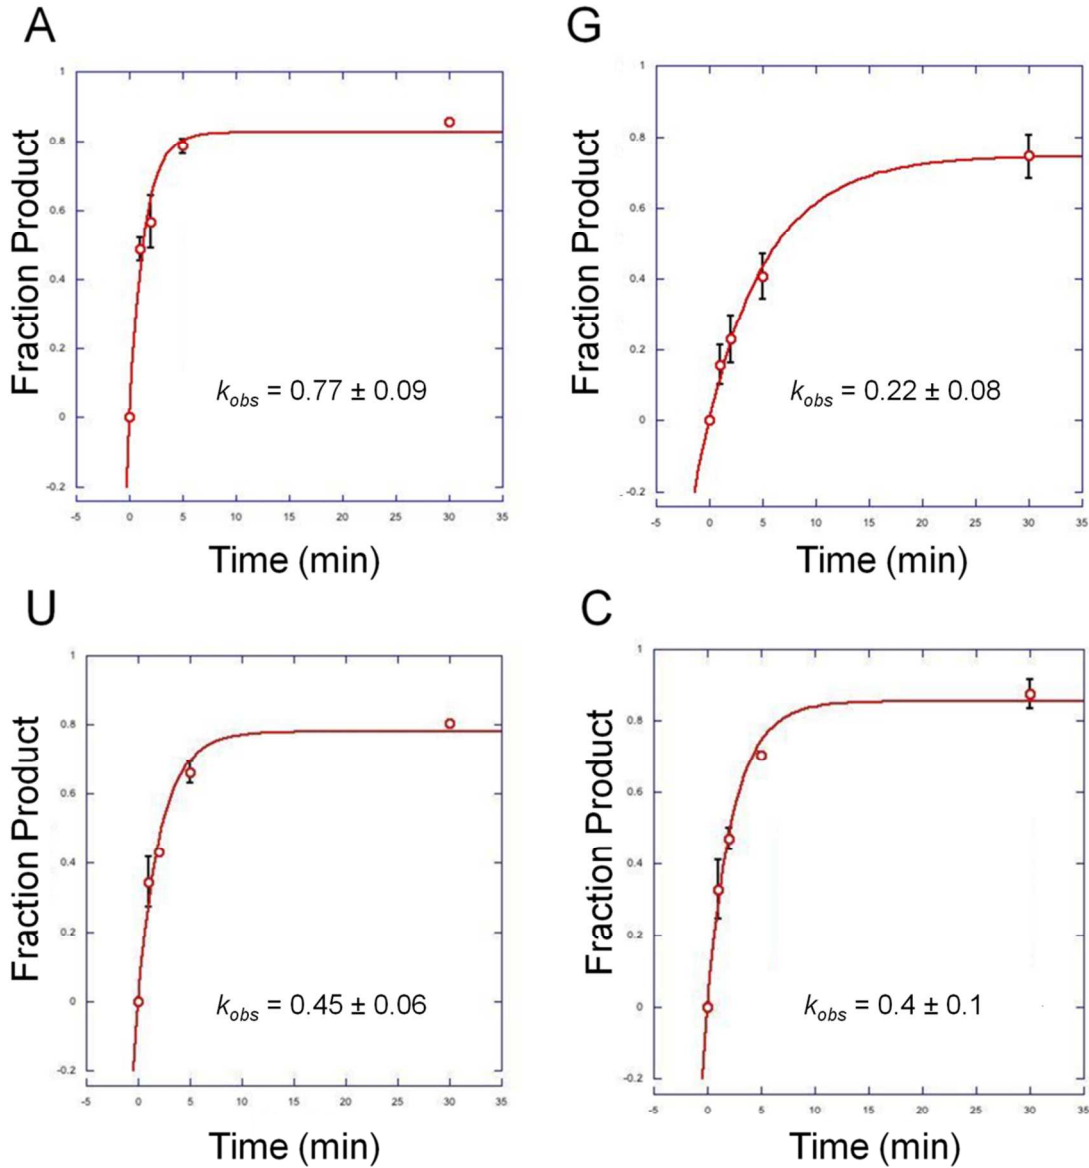

**Supplementary Figure 5.** Comparison of *in vitro* deamination rates of ADAR substrates GluR B and GluR B G2292A, C2335U with hADAR2. Rates were determined as described above (**Supplementary Figure 2**). GluR B  $k_{\text{obs}}$   $0.21 \pm 0.08$ , GluR B G2292A, C2335U  $k_{\text{obs}}$   $0.30 \pm 0.01$ . Error represents standard error ( $n = 3, P = 0.29$ ). Edited adenosine is colored red and mutated nucleotides are colored green.

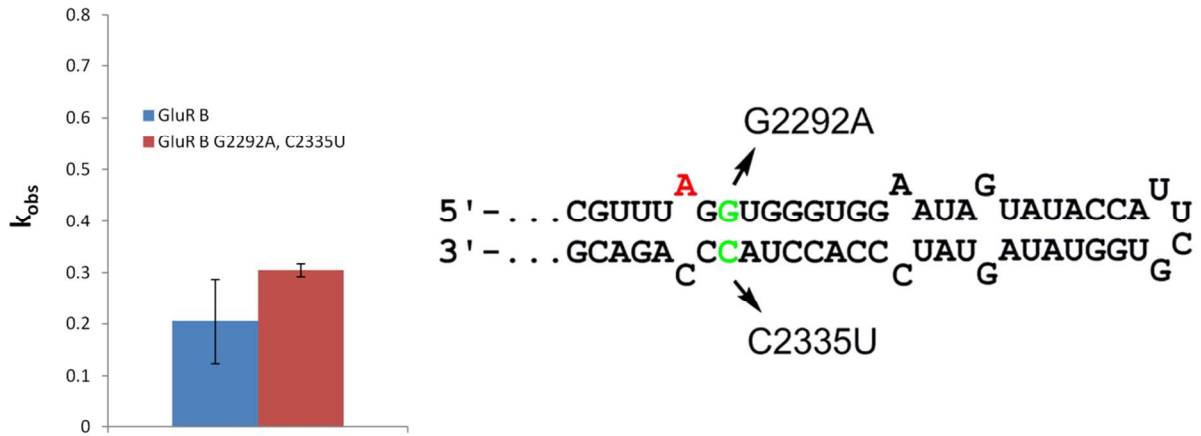

**Supplementary Figure 6.** Co-expression of Bdf2p suppresses hADAR2-induced slow growth phenotype. **A** Spotting assay of candidate transcripts co-expressed with hADAR2. INVSc1 transfected with ADAR2 wt or ADAR2 E396A, *BDF2*, or *HAC1*, cell count decreasing from right to left. **B** Western analysis of cell lysates from yeast transfected with ADAR2 wt + *BDF2* and ADAR2 wt alone. 1 – ADAR2 wt standard, 2 – yeast lysate ADAR2 wt + *BDF2*, 3 – yeast lysate ADAR2 wt.

**A**

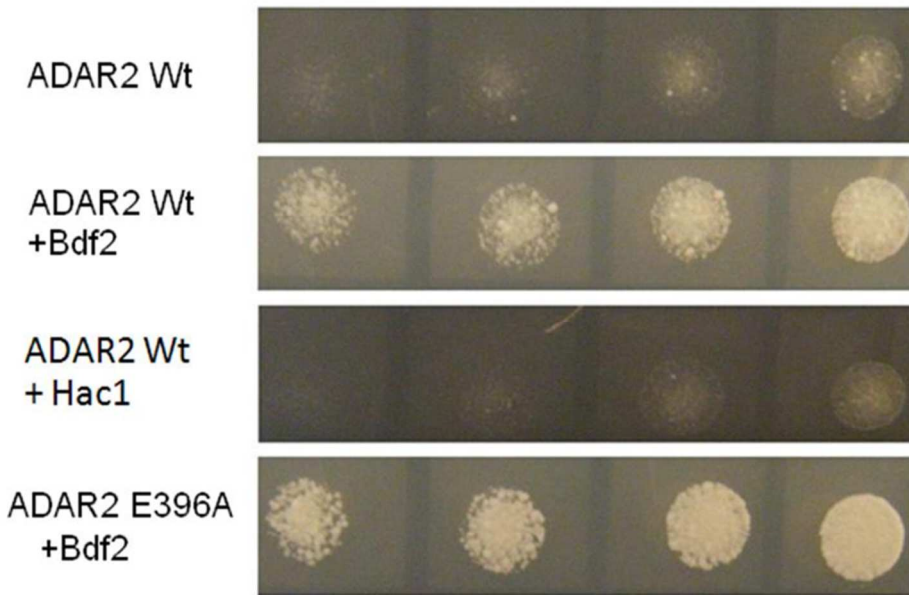

**B**

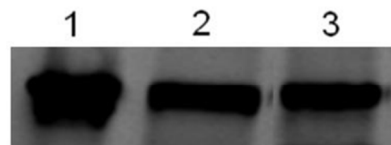

Supplement: NIHMS533892-supplement-1.pdf [file NIHMS533892-supplement-1.pdf]
